# Supplementary material for: Hand Hygiene, Mask-Wearing Behaviors and Its Associated Factors during the COVID-19 Epidemic: A Cross-Sectional Study among Primary School Students in Wuhan, China
Source: MDPI journal article supplement (doi:10.3390/ijerph17082893), 2020-04-22
Supplement: s1 [file s1]

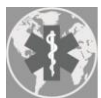

*Supplementary Material*

# Investigation on Health Behaviors of Primary School Students in Wuhan

Dear students,

Thanks for your attention! We are students at Wuhan University. The Coronavirus Disease 2019 (COVID-19) epidemic affects everyone's emotion. In order to better understand the current situation of hand hygiene and face masks among primary school students, we sincerely invite you to conduct a questionnaire survey. The questionnaire should be filled in by the students uniformly, and the parents were required to supervise their children and explain the questionnaire. This research will not harm your health and will not affect your current work. All your information will be treated in strict confidence and kept by the investigator. There are 24 questions in the questionnaire. Please answer the questions based on real conditions. Thank you for your active participation again!

Q1 Would you like to participate in this survey? Yes ☐ No ☐

If yes, please you or your parents sign your name in question 2 and fill in the following question. If no, the investigation ends.

## **Part 1. Sociodemographic characteristics**

Q2 Name: \_\_\_\_\_

Q3 Gender: Boy ☐ Girl ☐

Q4 Age: \_\_\_\_\_ years

Q5 Grade: First grade ☐ Second grade ☐ Third grade ☐  
Fourth grade ☐ Fifth grade ☐ Sixth grade ☐

Q6 Outgoing history: Yes ☐ No ☐

Q7 Mother's occupation:

- Temporary workers or laid-off and unemployed ☐
- Professional and technical personnel (doctors, teachers, lawyers, engineers) ☐
- General employees (general civil servants, company employees) ☐
- Managers and leaders of state agencies, enterprises and institutions ☐
- Business and service workers ☐
- Peasant ☐
- Operators of production and transportation equipment ☐
- Others ☐

Q8 Father's occupation:

- Temporary workers or laid-off and unemployed ☐
- Professional and technical personnel (doctors, teachers, lawyers, engineers) ☐
- General employees (general civil servants, company employees) ☐
- Managers and leaders of state agencies, enterprises and institutions ☐
- Business and service workers ☐
- Peasant ☐
- Operators of production and transportation equipment ☐
- Others ☐

Q9 Mother's educational background

- Primary school and below ☐ Junior high school ☐
- High school or technical secondary school or secondary vocational technical school ☐
- Junior college or undergraduate ☐ Postgraduate and above ☐

Q10 Father's educational background

- Primary school and below ☐ Junior high school ☐  
 High school or technical secondary school or secondary vocational technical school ☐  
 Junior college or undergraduate ☐ Postgraduate and above ☐  
 Q11 Residence: Wuhan ☐ Hubei except for Wuhan ☐ China except for Hubei ☐  
 Q12 Time filling out the survey (one month backward):  
 Before Wuhan locked-down ☐ After Wuhan locked-down ☐

## Part 2. Hand hygiene

- Q13 In which of the following scenarios did you wash your hands in the past month?  
 Q13.1 Before dinner: Yes ☐ No ☐  
 Q13.2 After going to the toilet: Yes ☐ No ☐  
 Q13.3 After returning home: Yes ☐ No ☐  
 Q13.4 After touching the public goods: Yes ☐ No ☐  
 Q13.5 Before and after wearing a mask: Yes ☐ No ☐  
 Q13.6 After contacting with animals or handling animal feces: Yes ☐ No ☐  
 Q13.7 After contacting with tears, snot, sputum and saliva: Yes ☐ No ☐  
 Q13.8 After covering with cough or sneeze: Yes ☐ No ☐  
 Q14 How did you wash your hands in the past month?  
 Use running water and scrub with hand sanitizer or soap for at least 20 seconds, and the standard seven-step hand washing method was adopted ☐  
 Wash your hands with the water in the basin ☐  
 Rinse under running water ☐  
 Use running water and scrub with hand sanitizer or soap ☐  
 Q15 Did you rub your eyes, nose or mouth with your hands in the past month?  
 Always ☐ Often ☐ Seldom ☐ Never ☐

## Part 3. Mask-wearing behavior

- Q16 How often do you wear a mask when you go out in the past month?  
 Always ☐ Often ☐ Seldom ☐ Never ☐  
 Q17 What kind of mask do you choose in the past month?  
 Cotton yarn mask ☐ Disposable medical mask ☐ Medical surgical mask ☐  
 Medical protective mask ☐ Particulate protective mask ☐ Other types ☐  
 Q18 Will parents choose the right size mask according to your features in the past month?  
 Always ☐ Often ☐ Seldom ☐ Never ☐ Parents can't buy masks for children ☐  
 Q19 How often do you change your mask in the past month?  
 2-4 hours ☐ 1 day ☐ 2-5 days ☐ More than 5 days ☐  
 Do not replace the new mask, and continue to use it after cleaning ☐  
 Q20 What is the correct operation for wearing a surgical mask? (Multiple choices, there may be more than one answer)  
 Distinguish the inside and outside of the mask, as well as the top and bottom. The mask is light inside and dark outside, and there are metal strips (nose clips) on the top ☐  
 Fully unfold the folded face of the mask to cover the nose, mouth and chin ☐  
 Put the fingertips of both hands on the nose clip, start from the middle position, and shape the nose clip according to the shape of the nose bridge ☐  
 Check whether the edge of the mask fits your face ☐  
 Wear at will regardless of the front and back ☐  
 Never wear a mask ☐  
 Q21 How did you wear a mask in the past month?  
 Wear it with parents' help, but never in the correct way ☐

- Wear it with parents' help, but rarely in the correct way ☐
- Wear it with parents' help, and often in the correct way ☐
- Wear it with parents' help, and always in the correct way ☐
- Wear it by yourself, but never in the correct way ☐
- Wear it by yourself, but rarely in the correct way ☐
- Wear it by yourself, and often in the correct way ☐
- Wear it by yourself, and always in the correct way ☐
- Never wear a mask ☐

Q22 After wearing the mask, which of the following behaviors are appropriate?

- Touch the front of the mask with your hand ☐
- Feel free to take off the mask of yourself or others ☐
- Take off the mask and put it back on ☐
- Pull the mask down to reveal the nose or mouth ☐
- None of the above behaviors ☐

**Thanks for your participation!**
